# Supplementary material for: Characterization and synthesis of indole-3-acetic acid in plant growth promoting Enterobacter sp
Source: PubMed Central journal article supplement — RSC Adv. 2021 Sep 24;11(50):31601–7. doi: 10.1039/d1ra05659j (PMC9041686; doi:10.1039/d1ra05659j), 2021-09-24

Supplementary materials

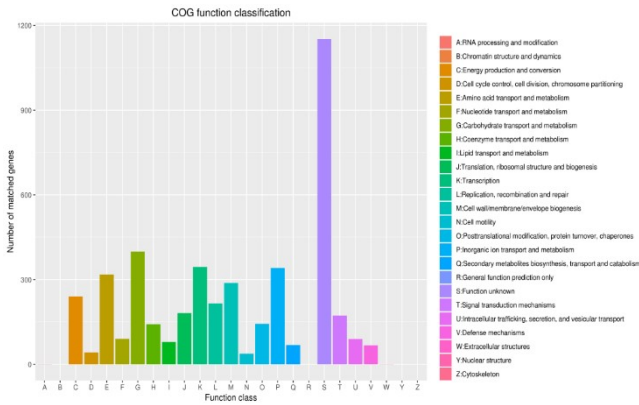

Fig. S1 COG analysis of *E. xiangfangensis* BWH6

Fig. S3 KEGG analysis of *E. xiangfangensis* BWH6

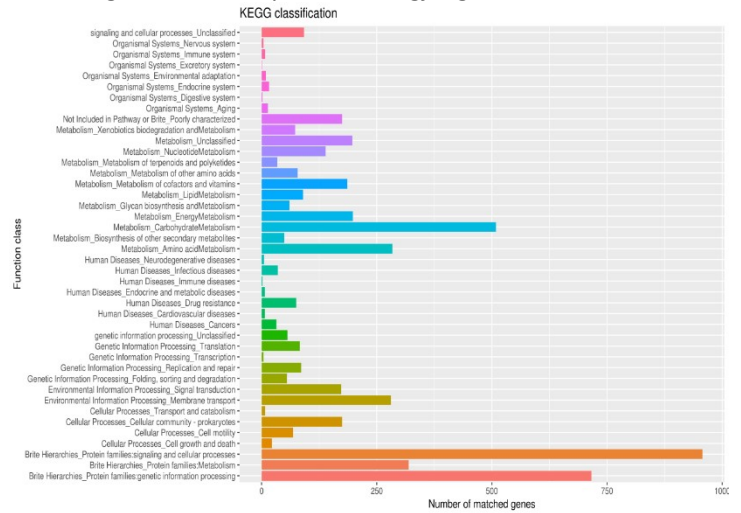

Fig. S4 KEGG classification of *E. xiangfangensis* BWH6

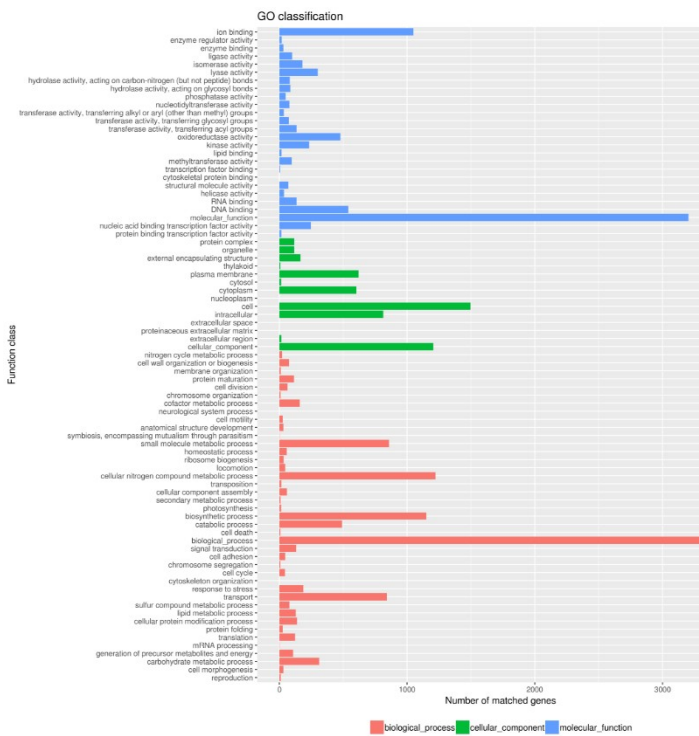

Fig. S2 GO classification of *E. xiangfangensis* BWH6

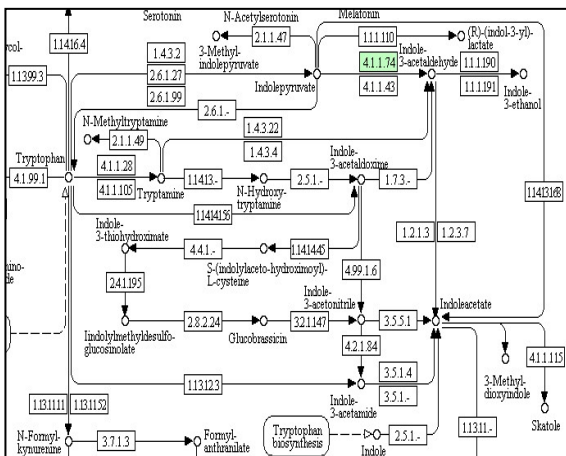

Supplement: RA-011-D1RA05659J-s001.pdf [file RA-011-D1RA05659J-s001.pdf]
